# Supplementary material for: Poly(l-lysine) modified zein nanofibrous membranes as efficient scaffold for adhesion, proliferation, and differentiation of neural stem cells
Source: Royal Society of Chemistry journal article supplement (doi:10.1039/c7ra00189d), 2017-01-01
Supplement: c7ra00189d1.pdf [file c7ra00189d1.pdf]

Supporting Information

**Poly(*L*-lysine) modified zein nanofibrous membranes as efficient scaffold  
for adhesion, proliferation and differentiation of neural stem cells**

Yingling Miao<sup>a,b,2</sup>, Ruirui Yang<sup>c,d,2</sup>, David YB Deng<sup>c\*,1</sup> and Li-Ming Zhang<sup>b\*,1</sup>

<sup>a</sup> Department of Polymer and Materials Science, School of Chemistry, Key Laboratory for Polymeric Composite and Functional Materials of Ministry of Education, Guangdong Provincial Key Laboratory for High Performance Polymer-based Composites, Sun Yat-sen University, Guangzhou 510275, China

<sup>b</sup> School of Materials Science and Engineering, Sun Yat-sen University, Guangzhou 510275, China

<sup>c</sup> Research Center of Translational Medicine, The First Affiliated Hospital, Guangdong Provincial Key Laboratory of Orthopedics and Traumatology, Sun Yat-sen University, Guangzhou 510080, China

<sup>d</sup> Department of Pathophysiology, Taishan Medical University, Taian 271016, China

E-mail addresses: dengyub@mail.sysu.edu.cn (David YB Deng), ceszhlm@mail.sysu.edu.cn (Li-Ming Zhang).

<sup>1</sup> Both corresponding authors contributed equally to this work.

<sup>2</sup> Both authors contributed equally to this work.

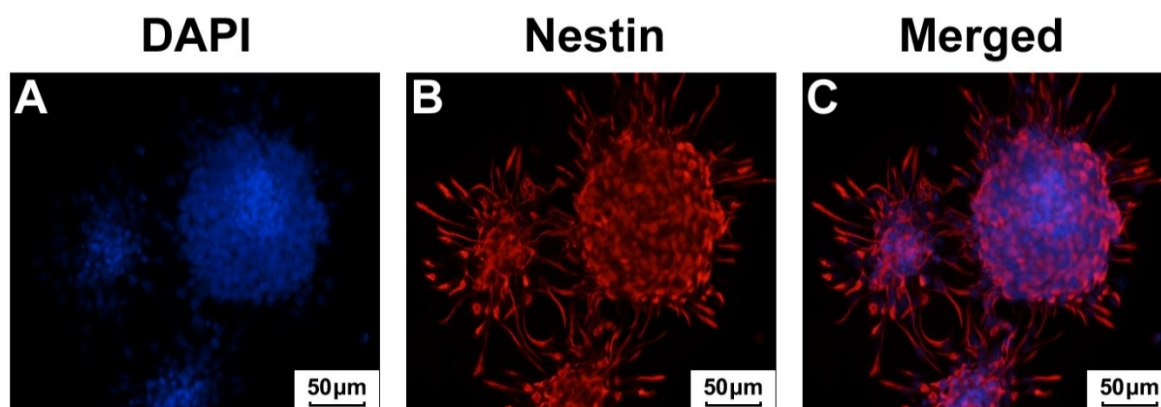

**Fig. S1** The cells used in this study have characteristics of neural stem/progenitor cells.

NSCs were cultured in the growth medium formed neurospheres. These cells exhibited neural stem/ progenitor cells, Nestin (B, C and red). Nuclei were stained with DAPI (A, blue).
